# Supplementary material for: Facile construction of gemini-like surfactants at the interface and their effects on the interfacial tension of a water/model oil system
Source: Royal Society of Chemistry journal article supplement (doi:10.1039/c7ra03973e), 2017-01-01
Supplement: c7ra03973e1.pdf [file c7ra03973e1.pdf]

## Electronic Supplementary Information

Table S1 The main composition and properties of the crude oil.

| Density<br>(g/mL) | Viscosity<br>(mPa·s,<br>50 °C) | Freezing<br>point<br>(°C) | Sulfur<br>(wt%) | Wax<br>(wt%) | Gelatine+<br>Asphaltene<br>(wt%) | Acid<br>number<br>(mgKOH/g) |
|-------------------|--------------------------------|---------------------------|-----------------|--------------|----------------------------------|-----------------------------|
| 0.962             | 608                            | -0.3                      | 0.16            | 4.7          | 27.6                             | 3.3                         |

Table S2 The composition of the used formation brine.

| Na <sup>+</sup> +K <sup>+</sup><br>(mg/L) | Mg <sup>2+</sup><br>(mg/L) | Ca <sup>2+</sup><br>(mg/L) | Cl <sup>-</sup><br>(mg/L) | SO <sub>4</sub> <sup>2-</sup><br>(mg/L) | HCO <sub>3</sub> <sup>-</sup><br>(mg/L) | CO <sub>3</sub> <sup>2-</sup><br>(mg/L) |
|-------------------------------------------|----------------------------|----------------------------|---------------------------|-----------------------------------------|-----------------------------------------|-----------------------------------------|
| 490                                       | 11                         | 33                         | 279                       | 43                                      | 868                                     | 25                                      |

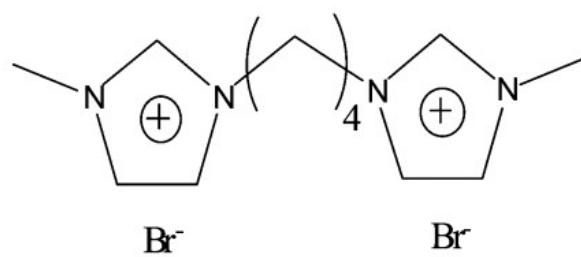

Fig. S1. Molecular structure of butane-1,4-bis (methylimidazolium bromide) (BBMB).<sup>40</sup>

Table S3 The IFT between BBMB aqueous solutions and model oils

| BBMB concentration (mg/L) | 0      | 5000   | 10000  | 50000  |
|---------------------------|--------|--------|--------|--------|
| IFT (mN/m)                | 20.605 | 20.198 | 19.631 | 18.983 |

Table S4 IFT values between the mixed surfactant (5000 mg/L) and BBMB aqueous solutions and model oil at 30 °C

| Molar ratio<br>(surfactant:BBMB) | IFT (mN/m)          |                    |                    |
|----------------------------------|---------------------|--------------------|--------------------|
|                                  | SBDS/BBMB<br>system | SDS/BBMB<br>system | M12/BBMB<br>system |
| 1:0                              | 0.701               | 0.967              | 4.319              |
| 2:1                              | 0.0714              | 0.922              | 3.832              |
| 1:1                              | 0.0550              | 0.858              | 3.018              |
| 1:2                              | 0.0443              | 0.484              | 2.491              |

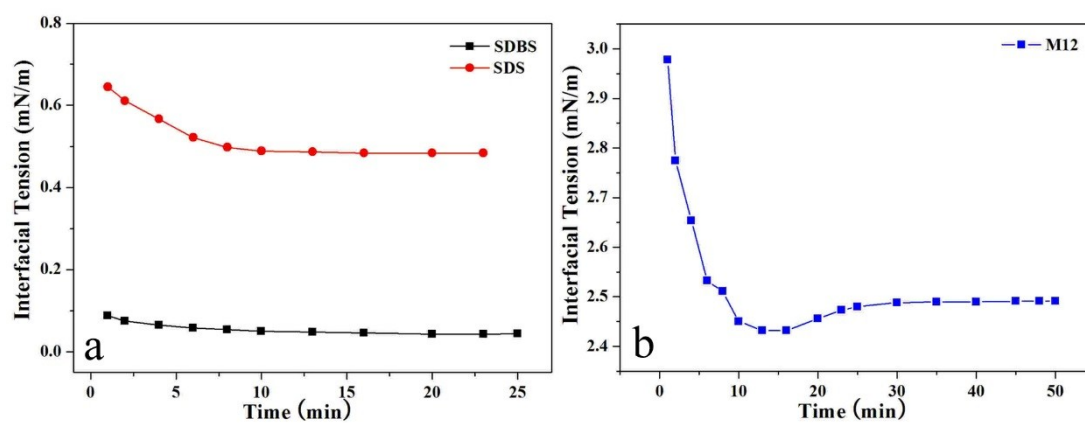

Fig. S2. Effects of additional BBMB molecules on the dynamic IFT between different surfactant aqueous solutions (5000 mg/L, Surfactant/BBMB molar ratio is 1:2) and model oil at 30 °C.
